# Supplementary material for: CRISPR/Cas9-Mediated Genome Editing of Herpesviruses Limits Productive and Latent Infections
Source: PubMed Central journal article supplement (PMC4928872; doi:10.1371/journal.ppat.1005701), 2016-06-30
Supplement: ppat.1005701.s007.pdf [file ppat.1005701.s007.pdf]

**S3 Table. No signs for off-targeting activity of anti-HCMV and anti-EBV gRNAs**

| Off-target site | Off-target sequence <sup>a</sup>                            | # mismatches + location <sup>b</sup> | gRNA-positive cells            |                        |           | gRNA-negative cells            |                        |           | gRNA-pos minus gRNA-neg <sup>e</sup> |
|-----------------|-------------------------------------------------------------|--------------------------------------|--------------------------------|------------------------|-----------|--------------------------------|------------------------|-----------|--------------------------------------|
|                 |                                                             |                                      | # sequences total <sup>c</sup> | # mutated <sup>d</sup> | % mutated | # sequences total <sup>c</sup> | # mutated <sup>d</sup> | % mutated |                                      |
| EBNA1 #1 OFF1   | GCCTCTG <b>GT</b> TCCTGAGCCGCC <b>AGG</b>                   | 3MMs [2:4:8]                         | 1930                           | 5                      | 0,26      | 1024                           | 3                      | 0,29      | -0,03                                |
| EBNA1 #1 OFF2   | TGCCCT <b>CG</b> TCCTGAGCCGCC <b>GGG</b>                    | 3MMs [1:7:8]                         | 2558                           | 6                      | 0,23      | 1300                           | 5                      | 0,38      | -0,15                                |
| EBNA1 #1 OFF3   | TGCC <b>TTA</b> ATCCTGAGCCGCC <b>AAG</b>                    | 3MMs [1:5:7]                         | 1665                           | 14                     | 0,84      | 1110                           | 10                     | 0,90      | -0,06                                |
| EBNA1 #2 OFF1   | GT <b>TT</b> GA <b>GC</b> CATGTCTGACGAG <b>GGG</b>          | 3MMs [3:7:8]                         | 1628                           | 52                     | 3,19      | 904                            | 33                     | 3,65      | -0,46                                |
| EBNA1 #2 OFF2   | GTGAGAA <b>GC</b> CATGTCTGAC <b>AGAG</b>                    | 3MMs [4:8:19]                        | 1755                           | 20                     | 1,14      | 953                            | 17                     | 1,78      | -0,64                                |
| EBNA1 #2 OFF3   | <b>CT</b> GTGAA <b>AC</b> CATGTCTGAG <b>GATGG</b>           | 3MMs [1:8:18]                        | 2449                           | 13                     | 0,53      | 1182                           | 12                     | 1,02      | -0,48                                |
| OriP #2 OFF1    | GT <b>AT</b> TAC <b>TC</b> CACATAGAA <b>AATTTGG</b>         | 3MMs [4:8:17]                        | 2085                           | 13                     | 0,62      | 1089                           | 11                     | 1,01      | -0,39                                |
| OriP #2 OFF2    | GTACCAC <b>CC</b> TCATAGAGAG <b>GTTAG</b>                   | 3MMs [5:10:19]                       | 2414                           | 19                     | 0,79      | 1133                           | 13                     | 1,15      | -0,36                                |
| OriP #2 OFF3    | <b>GAAAGG</b> CCACATAGAGAT <b>TTAG</b>                      | 4MMs [2:4:5:6]                       | 1749                           | 10                     | 0,57      | 937                            | 5                      | 0,53      | 0,04                                 |
| UL44 #2 OFF1    | G <b>CC</b> GATGAAG <b>GCG</b> TACAAGAA <b>AAG</b>          | 3MMs [3:5:11]                        | 2348                           | 20                     | 0,85      | 1186                           | 8                      | 0,67      | 0,18                                 |
| UL44 #2 OFF2    | G <b>AGG</b> CTG <b>GGG</b> CCGTACAAG <b>GCGG</b>           | 4MMs [2:8:9:20]                      | 603                            | 2                      | 0,33      | 353                            | 2                      | 0,57      | -0,23                                |
| UL44 #2 OFF3    | G <b>GGG</b> CT <b>TC</b> AG <b>CC</b> TTACAAGAG <b>GAG</b> | 4MMs [2:7:8:13]                      | 1229                           | 10                     | 0,81      | 617                            | 2                      | 0,32      | 0,49                                 |
| UL57 #3 OFF1    | GT <b>AG</b> CT <b>TC</b> TAC <b>CT</b> AGGATCAC <b>GAG</b> | 3MMs [3:8:13]                        | 2132                           | 11                     | 0,52      | 1009                           | 7                      | 0,69      | -0,18                                |
| UL57 #3 OFF2    | GTGG <b>GT</b> TT <b>CACT</b> GAGGATCAC <b>GAG</b>          | 3MMs [5:9:12]                        | 2303                           | 11                     | 0,48      | 1158                           | 10                     | 0,86      | -0,39                                |
| UL57 #3 OFF3    | <b>ATGC</b> TT <b>ATAC</b> AGAGGATCAT <b>AG</b>             | 4MMs [1:4:8:12]                      | 2326                           | 16                     | 0,69      | 1231                           | 11                     | 0,89      | -0,21                                |
| UL105 #3 OFF1   | G <b>G</b> CTGAG <b>GGAGG</b> GAAACCAC <b>AGG</b>           | 3MMs [2:7:12]                        | 597                            | 4                      | 0,67      | 438                            | 6                      | 1,37      | -0,70                                |
| UL105 #3 OFF2   | GA <b>AT</b> GTATG <b>CAGG</b> GAAACCAC <b>TAG</b>          | 3MMs [3:9:12]                        | 2205                           | 17                     | 0,77      | 1027                           | 8                      | 0,78      | -0,01                                |
| UL105 #3 OFF3   | <b>TACT</b> GTATGGAT <b>TG</b> GAAACCAC <b>AGG</b>          | 3MMs [1:11:12]                       | 1451                           | 11                     | 0,76      | 668                            | 8                      | 1,20      | -0,44                                |

<sup>a</sup>potential off-target sequence. Mismatches as compared to the gRNA are indicated in bold and red whereas the PAM sequence is indicated in bold

<sup>b</sup>number of mismatches (MM) and location of mismatch as compared to the gRNA is indicated

<sup>c</sup>Number of sequences analyzed

<sup>d</sup>Number of sequences displaying alterations as compared to the reference sequence. A sequence scored as 'mutated' when there was a mismatch/indel 2bp up and downstream of the Cas9 cleavage site

<sup>e</sup>Percentage of mismatches that could have occurred by CRISPR/Cas9 mediated gene editing. The percentage of edited sequences in gRNA-expressing cells was subtracted from the percentage of gRNA-negative cells. A negative value denotes a higher percentage of mutations in gRNA-negative cells as compared to gRNA-expressing cells.
